# Supplementary material
Source: Research Square preprint supplement (doi:10.21203/rs.3.rs-8986426/v1)
Supplement: Supplementary file 1 [file e4e688b92a6b1fb565f8a187.docx]

Supplementary information for:

**Integrated effects of light intensity, spectral composition and photoperiod fragmentation on duckweed growth and nutrient removal**

**
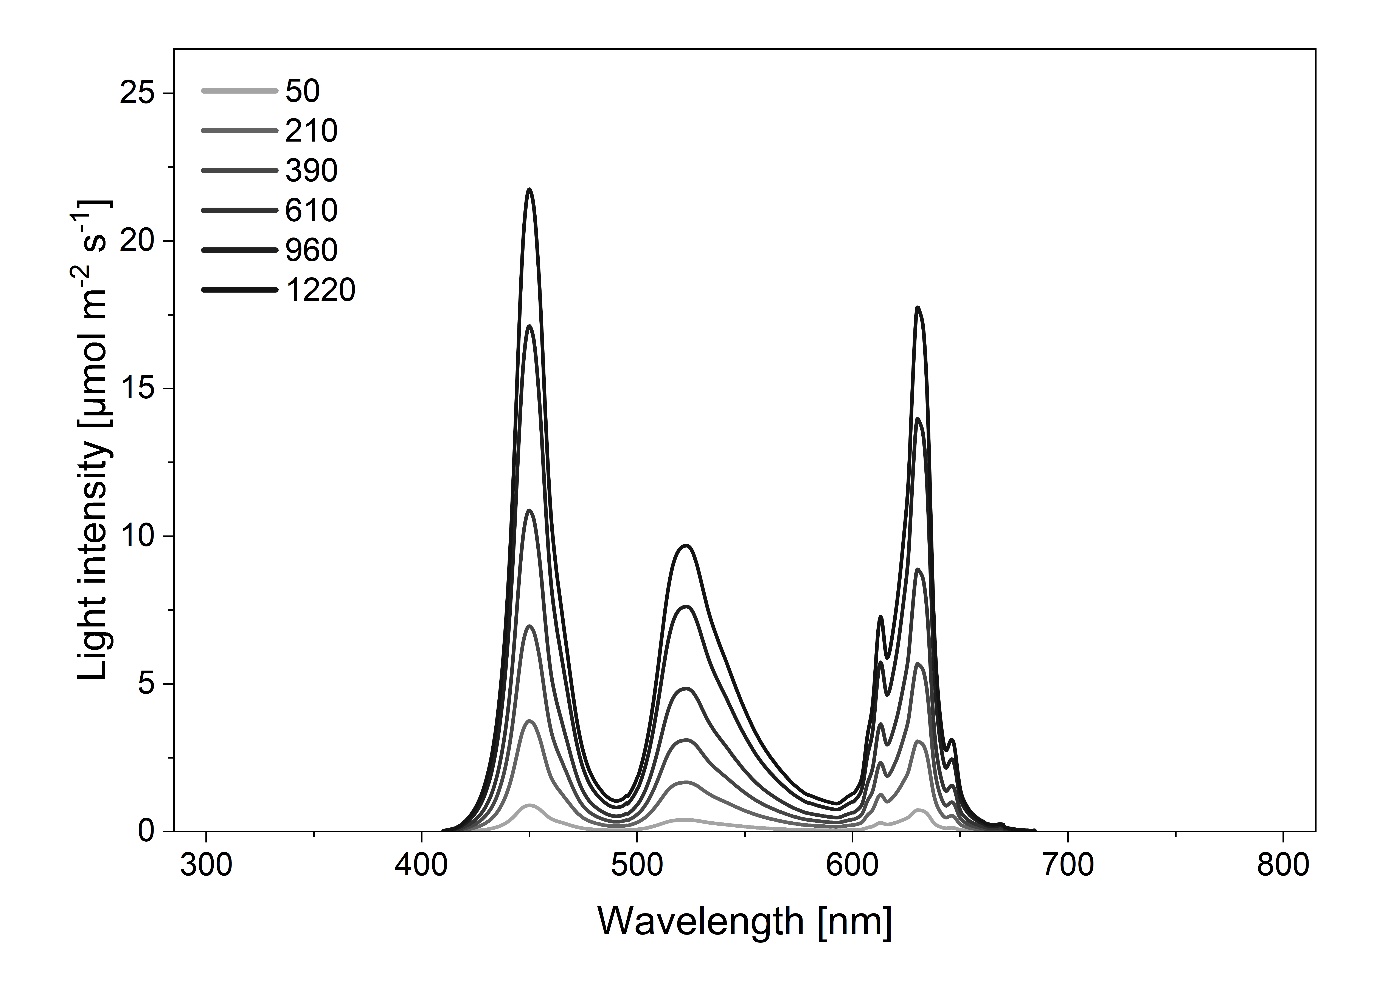
**

**Figure S1.** Emission spectra recorded at six PPFD levels (50–1220 µmol m⁻² s⁻¹) used in the light-intensity experiment.

**
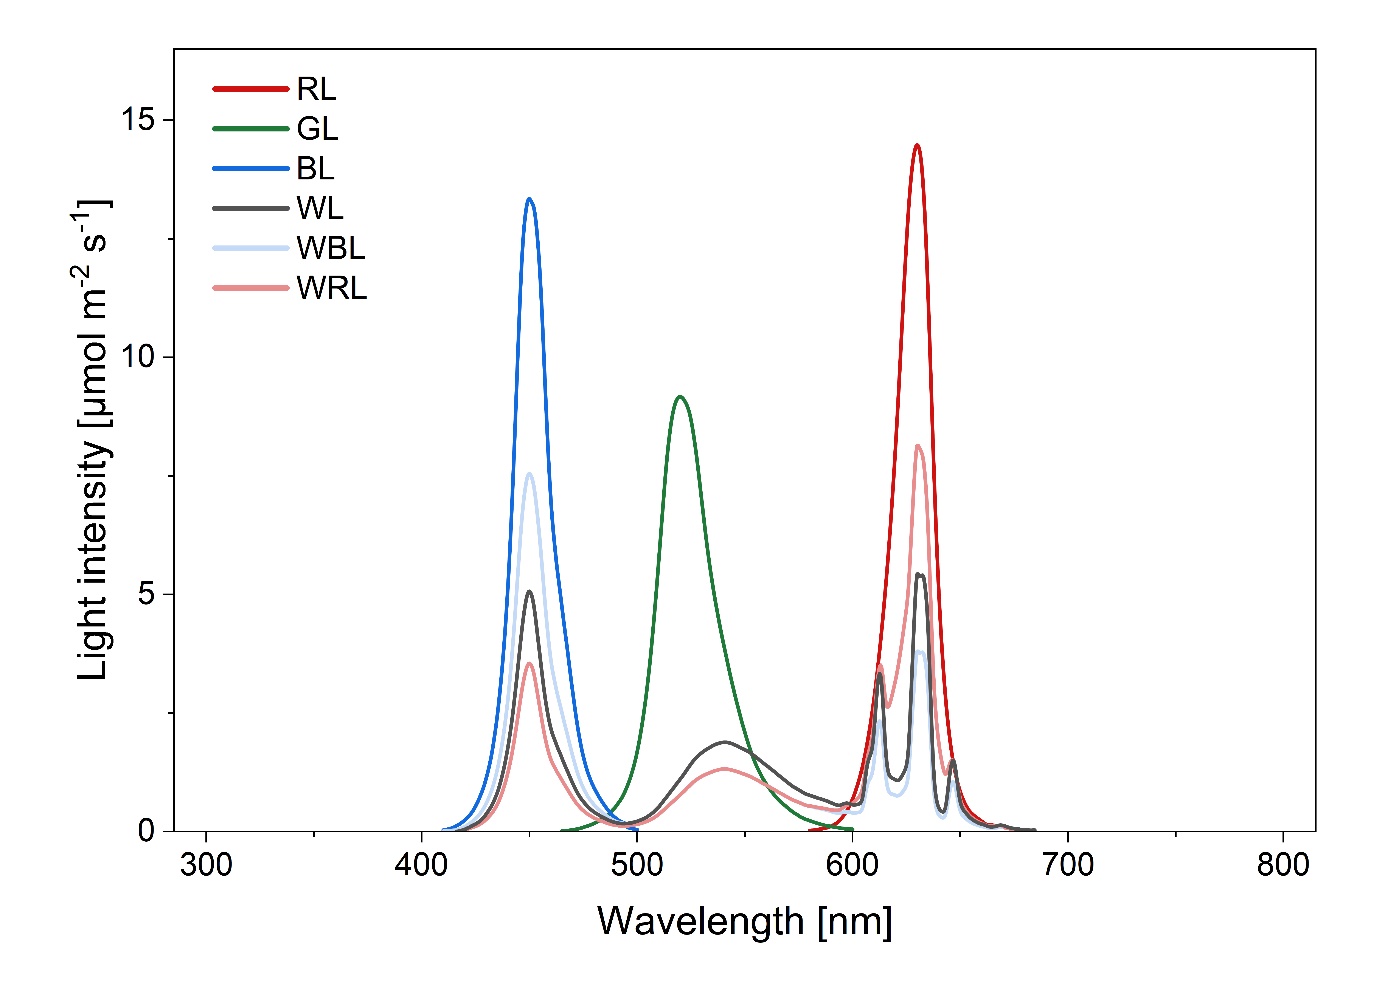
**

**Figure S2.** Emission spectra of the six spectral treatments used in the light-spectrum experiment: blue (BL), green (GL), red (RL), white (WL), white/blue split (WBL), and white/red split (WRL).

**Table S1.** Parameters of the Gompertz model fitted to the light-intensity response curves (estimate ± SD) for frond number- and frond surface area-based RGR, and dry biomass of *L. minor*, *L. punctata*, and *S. polyrhiza*, together with the coefficient of determination (R²).

| **Plant species** | **Frond number** | | | | **Frond surface** | | | | **Dry biomass** | | | | |
| --- | --- | --- | --- | --- | --- | --- | --- | --- | --- | --- | --- | --- | --- |
| **RGRmax** | **xc** | **k** | **R2** | **RGRmax** | **xc** | **k** | **R2** | **DWmax** | **xc** | **k** | **R2** |
| *L. minor* | 0.448 ± 0.005 | -54.842 ± 23.474 | 0.006 ± 0.000 | 0.976 | 0.453 ± 0.009 | -159.212 ± 68.116 | 0.005 ± 0.002 | 0.928 | 12.890 ± 0.400 | 111.918 ± 8.475 | 0.007 ± 0.001 | 0.991 |
| *L. punctata* | 0.367 ± 0,003 | 5.676 ± 10.101 | 0.008 ± 0.000 | 0.991 | 0.381 ± 0.001 | 8.475 ± 3.470 | 0.011 ± 0.000 | 0.998 | 11.760 ± 0.226 | 96.096 ± 7.506 | 0.007 ± 0.001 | 0.996 |
| *S. polyrhiza* | 0.341 ± 0.004 | 12.970 ± 13.066 | 0.015 ± 0.002 | 0.939 | 0.328 ± 0.005 | 19.194 ± 7.734 | 0.012 ± 0.001 | 0.983 | 21.270 ± 1.420 | 90.866 ± 11.974 | 0.009 ± 0.001 | 0.979 |
